# Supplementary material for: Azelaic Acid Exerts Antileukemia Effects against Acute Myeloid Leukemia by Regulating the Prdxs/ROS Signaling Pathway
Source: Hindawi journal article supplement (doi:10.1155/2020/1295984), 2020-12-23
Supplement: f1 [file 1295984.f1.pdf]

## Azelaic acid exerts antileukemia effects against acute myeloid leukemia by regulating the Prdxs/ROS signaling pathway

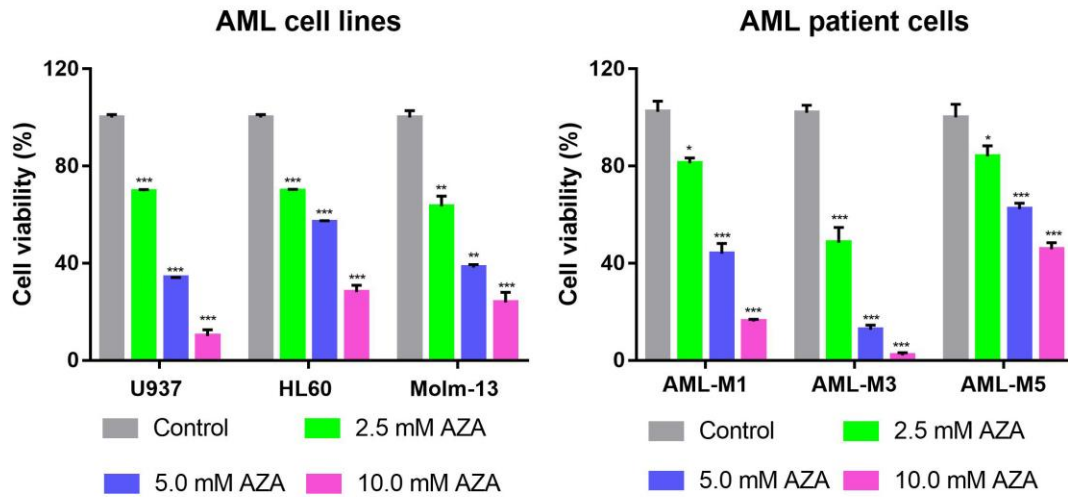

**Figure S1.** AML cell lines and different types of AML patient cells were treated with different concentration of AZA for 24 h. Cell viability was measured by the CCK-8 method.

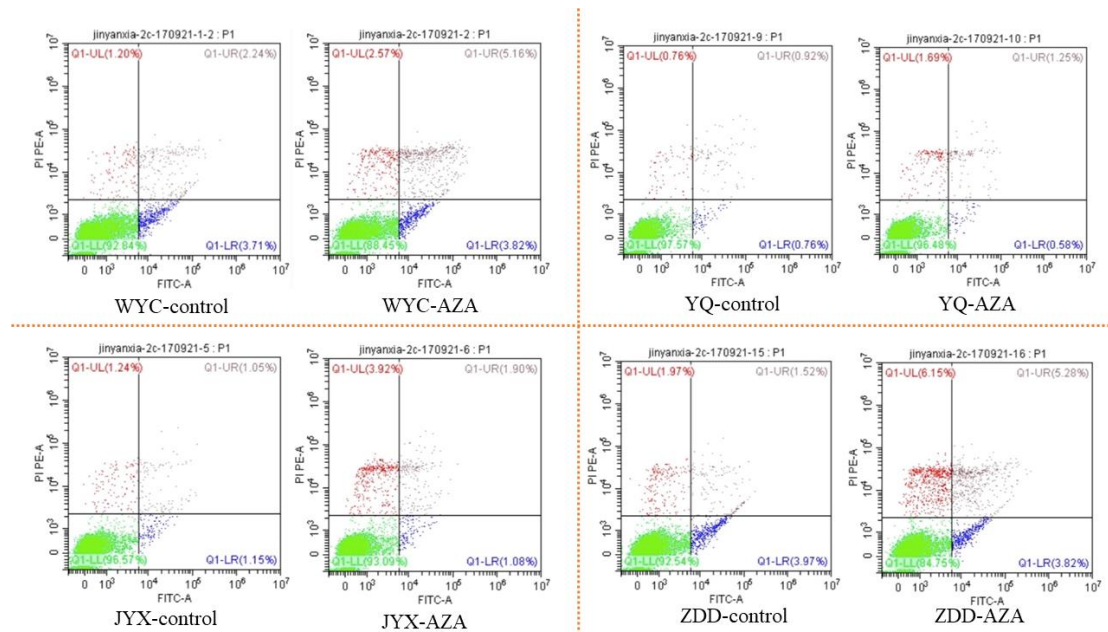

**Figure S2.** Cell apoptosis rate was analyzed by flow cytometry after healthy PBMCs were treated with 5.0 mM AZA for 24 h.

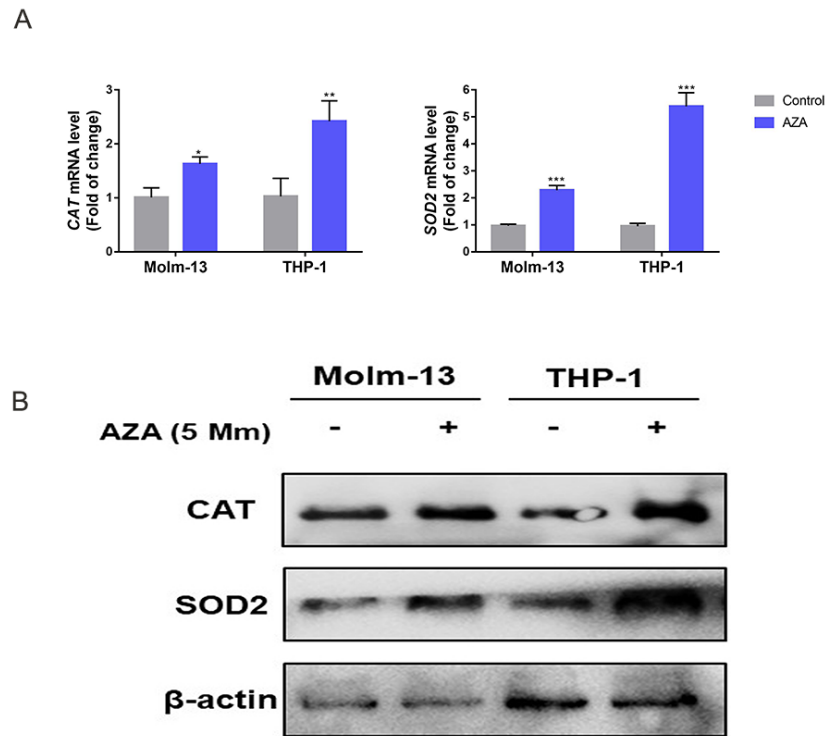

**Figure S3.** The expression levels of SOD2 and CAT in Molm-13 and THP-1 cells after AZA treatment and their detection by RT-PCR (A) and western blot (B). SOD2 (Cat# 24127-1-AP) and CAT (Cat# 21260-1-AP) used for WB were from ProteinTech (USA). The Primers for RT-PCR are as followed: SOD2 (*MnSOD*): forward 5'-GCC TCC CTG ACC TGC CTT AC-3', reverse 5'-GCA TGA TCT GCG CGT TAA TG-3'; CAT (*Catalase*): forward 5'-CCC AGA AGC CTA AGA ATG CAA-3', reverse 5'-GCT TTT CCC TTG GCA GCT ATG-3

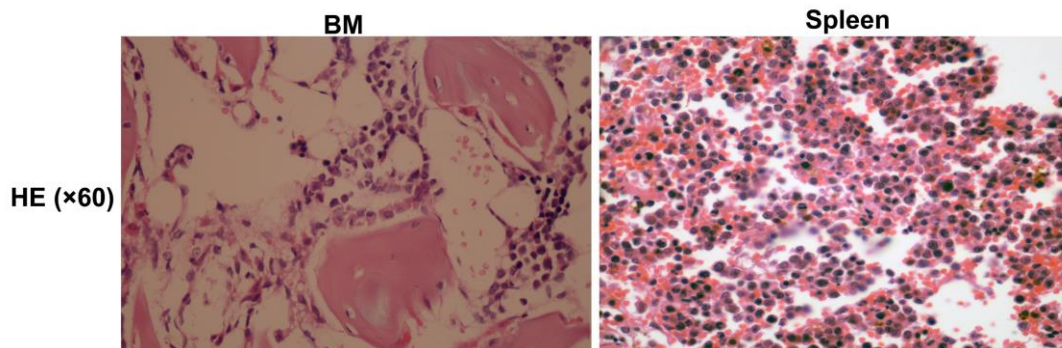

**Figure S4.** AML patient cells could be observed on the bone marrow (BM) and spleen smears by hematoxylin and eosin stain under a microscope. Magnification:  $\times 60$ .

| Type                                                     | Genetic mutation                                                                                                 |
|----------------------------------------------------------|------------------------------------------------------------------------------------------------------------------|
| AML-M1                                                   | CEBPA, FLT3-ITD mutation                                                                                         |
| AML-M3                                                   | None                                                                                                             |
| AML-M5 ( it was also used for construction of PDX model) | FLT3-ITD,NPM1L mutation<br>Immunophenotyping:<br>express CD64, CD117,CD33,CD123;<br>some express: MPO, CD56,CD13 |

**Table S1. The detailed genetic information of AML patient cells.**

We uploaded the raw LC-MS data on PeptideAtlas according to the author's guideline. The direct URL is <http://www.peptideatlas.org/PASS/PASS01499> and the password is JG6834ntz.
